# Supplementary material for: EPI-ASTHMA study protocol: a population-based multicentre stepwise study on the prevalence and characterisation of patients with asthma according to disease severity in Portugal
Source: PubMed Central journal article supplement — BMJ Open. 2022 Sep 19;12(9):e064538. doi: 10.1136/bmjopen-2022-064538 (PMC9486331; doi:10.1136/bmjopen-2022-064538), 2022-09-19
Supplement: bmjopen-2022-064538.draft_revisions.pdf [file bmjopen-2022-064538.draft_revisions.pdf]

# BMJ Open

BMJ Open is committed to open peer review. As part of this commitment we make the peer review history of every article we publish publicly available.

When an article is published we post the peer reviewers' comments and the authors' responses online. We also post the versions of the paper that were used during peer review. These are the versions that the peer review comments apply to.

The versions of the paper that follow are the versions that were submitted during the peer review process. They are not the versions of record or the final published versions. They should not be cited or distributed as the published version of this manuscript.

BMJ Open is an open access journal and the full, final, typeset and author-corrected version of record of the manuscript is available on our site with no access controls, subscription charges or pay-per-view fees (<http://bmjopen.bmj.com>).

If you have any questions on BMJ Open's open peer review process please email [info.bmjopen@bmj.com](mailto:info.bmjopen@bmj.com)

# BMJ Open

## **EPI-ASTHMA study protocol - a population-based multicentre stepwise study on the prevalence and characterisation of patients with asthma according to disease severity in Portugal**

|                               |                                                                                                                                                                                                                                                                                                                                                                                                                                                                                                                                                                                                                                                                                                                 |
|-------------------------------|-----------------------------------------------------------------------------------------------------------------------------------------------------------------------------------------------------------------------------------------------------------------------------------------------------------------------------------------------------------------------------------------------------------------------------------------------------------------------------------------------------------------------------------------------------------------------------------------------------------------------------------------------------------------------------------------------------------------|
| Journal:                      | <i>BMJ Open</i>                                                                                                                                                                                                                                                                                                                                                                                                                                                                                                                                                                                                                                                                                                 |
| Manuscript ID                 | bmjopen-2022-064538                                                                                                                                                                                                                                                                                                                                                                                                                                                                                                                                                                                                                                                                                             |
| Article Type:                 | Protocol                                                                                                                                                                                                                                                                                                                                                                                                                                                                                                                                                                                                                                                                                                        |
| Date Submitted by the Author: | 10-May-2022                                                                                                                                                                                                                                                                                                                                                                                                                                                                                                                                                                                                                                                                                                     |
| Complete List of Authors:     | Jácome, Cristina; Center for Health Technology and Services Research<br>Brito, Dinis; USF 7fontes<br>João, Catarina; University of Porto,<br>Lopes, Filipa; MEDIDA<br>Santos, Janete; Center for Health Technology and Services Research<br>Amorim, Liliana; Digital Medicine Center P5<br>Barbosa, Maria João; University of Minho; Gualtar Family Health Unit<br>Pardal, Marisa; AstraZeneca<br>Teixeira, Pedro; University of Minho - Gualtar Campus,<br>Bernardo, Filipa; AstraZeneca<br>Fonseca, Joao A.; University of Porto<br>Correia-de-Sousa, Jaime; Life and Health Sciences Research Institute (ICVS)/3B's — PT Government Associate Laboratory, University of Minho; Horizonte Family Health Unit, |
| Keywords:                     | Asthma < THORACIC MEDICINE, EPIDEMIOLOGY, Chronic airways disease < THORACIC MEDICINE                                                                                                                                                                                                                                                                                                                                                                                                                                                                                                                                                                                                                           |
|                               |                                                                                                                                                                                                                                                                                                                                                                                                                                                                                                                                                                                                                                                                                                                 |

SCHOLARONE™  
Manuscripts

1  
2  
3  
4 1 **EPI-ASTHMA study protocol - a population-based multicentre stepwise study on**  
5  
6 2 **the prevalence and characterisation of patients with asthma according to**  
7  
8 3 **disease severity in Portugal**

9  
10 4 Cristina Jácome<sup>1,2</sup>, Dinis Brito<sup>3,4</sup>, Catarina João<sup>1</sup>, Filipa Lopes<sup>5</sup>, Janete Santos<sup>1</sup>, Liliana  
11  
12 5 Amorim<sup>6</sup>, Maria João Barbosa<sup>3,9</sup>, Marisa Pardal<sup>7</sup>, Pedro Teixeira<sup>3,6</sup>, Filipa Bernardo<sup>7</sup>,  
13  
14 6 João Almeida Fonseca<sup>1,2,5,8</sup>, Jaime Correia de Sousa<sup>3</sup>  
15  
16  
17 7

18  
19 8 Affiliations:

20  
21 9 1- Center for Health Technology and Services Research (CINTESIS), Faculty of  
22  
23 10 Medicine, University of Porto, Porto, Portugal;

24  
25  
26 11 2- Department of Community Medicine, Information and Health Decision Sciences  
27  
28 12 (MEDCIDS), Faculty of Medicine, University of Porto, Porto, Portugal

29  
30  
31 13 3- Life and Health Sciences Research Institute (ICVS), School of Medicine, University of  
32  
33 14 Minho, Braga, Portugal

34  
35  
36 15 4- Sete Fontes, Family Health Unit, Braga, Portugal

37  
38  
39 16 5- MEDIDA, Porto, Portugal

40  
41  
42 17 6- Digital Medicine Center P5, Braga, Portugal

43  
44  
45 18 7- AstraZeneca, Queluz, Lisboa, Portugal

46  
47  
48 19 8- Allergy Unit, Hospital and Institute CUF, Porto, Portugal

49  
50  
51 20 9-Gualtar Family Health Unit, Braga, Portugal

52  
53 21 Corresponding author: Cristina Jácome; Center for Health Technology and Services  
54  
55 22 Research (CINTESIS), Department of Community Medicine, Information and Health  
56  
57 23 Decision Sciences (MEDCIDS), Faculty of Medicine, University of Porto, Portugal; e-  
58  
59 24 mail: cristinajacome.ft@gmail.com  
60

1  
2  
3 25  
4  
56 **ABSTRACT**  
7

8 **Introduction:** In Portugal as in other countries, data on the epidemiology of asthma are  
9  
10 mainly grounded in questionnaire studies. Additionally, the detailed characterisation of  
11  
12 asthma in terms of disease severity, control and phenotypes remain scarce. Studies  
13  
14 assessing the prevalence of asthma and its sub-groups using accurate methods are  
15  
16 needed. This study aims to determine the prevalence of asthma, difficult-to-treat and  
17  
18 severe asthma, and to evaluate sociodemographic and clinical characteristics of those  
19  
20 patients, in mainland Portugal.  
21  
22

23 **Methods and analysis:** A population-based nationwide study with a multicentre  
24  
25 stepwise approach will be conducted between 2021-2023 in 38 primary care centres of  
26  
27 the Portuguese National Health Service. The stepwise approach will comprise 4 Stages:  
28  
29 Stage 0-telephone call invitation to adult subjects ( $\geq 18$  years) randomly selected  
30  
31 ( $n \sim 15000$ ); Stage 1-telephone screening interview assessing the participants' respiratory  
32  
33 symptoms ( $n \sim 7500$ ); Stage 2- diagnostic visit, including physical examination, diagnostic  
34  
35 tests (e.g., spirometry, fraction of exhaled nitric oxide, blood eosinophil count), and  
36  
37 patient-reported outcome measures for diagnostic confirmation of those identified with  
38  
39 possible asthma at Stage 1 ( $n \sim 1800$ ); Stage 3-further evaluation of patients with asthma  
40  
41 and of patients with difficult-to-treat asthma and severe asthma, after 3 months ( $n \sim 460$ ).  
42  
43 At Stage 3, data will be collected from a review of the patient's electronic health records,  
44  
45 a follow-up telephone call and the CARATm app database. The prevalence of asthma,  
46  
47 difficult-to-treat and severe asthma will be determined as the percentage of patients with  
48  
49 asthma confirmed from the overall population (Stage 1). For the analysis of factors  
50  
51 associated with asthma, difficult-to-treat and severe asthma, logistic regression models  
52  
53 will be explored.  
54  
55

56  
57 **Ethics and dissemination:** Ethical approvals for the study were obtained from the  
58  
59 ethics committee of the local health unit of Matosinhos, Porto (38/CES/JAS), Alto Minho  
60

1  
2  
3 52 (38/2021/CES) and the regional health administration of Lisbon-Vale do Tejo  
4  
5 53 (035/CES/INV/2021). Results will be published in peer-reviewed journals.  
6  
7  
8

9 55 Trial registration: ClinicalTrials.gov, NCT051696198. Registered at 27<sup>th</sup> December 2022.  
10  
11  
12

13 56

14 57 Strengths and limitations of this study

15  
16  
17 58 - EPI-ASTHMA is the first national population-based study with a multicentre stepwise  
18  
19 59 approach to determine the prevalence of asthma, difficult-to-treat and severe asthma In  
20  
21 60 Portugal.

22  
23  
24 61 - The outcome measures will enable a more comprehensive characterisation of patients  
25  
26 62 with asthma and a better understanding of their disease characteristics, treatment  
27  
28 63 patterns and use of healthcare resources.

29  
30  
31 64 - The knowledge generated by this study has great potential to inform health policies and  
32  
33 65 to improve the clinical outcomes of patients with asthma in Portugal.

34  
35  
36 66 - Time limited follow-up with lack of optimised management might be a source of error  
37  
38 67 in the estimation of the prevalence of asthma sub-groups.

39  
40  
41 68 - Heterogeneity in data collection across the country conveniently select regions may  
42  
43 69 prove challenging and a source of bias.

44  
45 70 **Keywords:** disease severity, severe asthma, difficult-to-treat asthma, epidemiology  
46  
47

48 71

49  
50 72

51  
52 73

53  
54 74  
55  
56  
57  
58  
59  
60

## 75 Introduction

76  
77 Asthma is a common chronic disease affecting all age groups. Worldwide, it is estimated  
78 that about 5 to 10% of people have asthma [1], with a significant wide variation across  
79 regions and countries [2]. To date, epidemiological data on prevalence have used  
80 heterogeneous methodologies due to difficulties in defining and diagnosing asthma,  
81 leading to highly variable estimates of asthma prevalence [3]. Some studies used non-  
82 standardised questionnaires, others included participants based on the assessment of  
83 lung function or responsiveness to bronchodilators. In Portugal, the 2011 National  
84 Asthma Survey was based on telephone interviews and indicated a prevalence of 6.8%  
85 [4]. Yet, previous studies have estimated a prevalence between 3.3 and 15% [5].  
86 Furthermore, similarly to the USA and Denmark Asthma Surveys, the 2005-2006  
87 Portuguese Health Survey, suggested that there is an underdiagnosis of asthma,  
88 particularly in the male population and in the country's southern regions [5]. The  
89 Portuguese National Program for Respiratory Diseases maintains strategic research  
90 objectives in epidemiological surveillance both in asthma prevalence and its  
91 underdiagnosis [6], which is in line with the recommendations from the Global Initiative  
92 for Asthma (GINA) [7].

93 Additionally, national data on the characterisation of patients with asthma, in terms of  
94 severity and control, remain lacking [8]. Worldwide, it is estimated that up to 17% of  
95 patients have difficult-to-treat and 3.7% have severe asthma [9], which are more likely to  
96 experience life-threatening exacerbations and consume additional healthcare resources.  
97 It is important to differentiate these severity groups, as difficult-to-treat asthma might be  
98 manageable in primary health care, eventually with concomitant support from a  
99 secondary care specialist, whereas severe asthma requires a specialised second or  
100 tertiary care approach [10]. Knowledge on the distribution of severity and characteristics  
101 of patients in each group will better support clinical management of the disease and will

1  
2  
3 102 inform personalised health policies for a future and smarter allocation of healthcare  
4  
5 103 resources.

6  
7  
8 104 The primary aim of this study is to determine the prevalence of asthma, difficult-to-treat  
9  
10 105 and severe asthma in Portugal. The secondary aims are to evaluate the  
11  
12 106 sociodemographic and clinical characteristics of patients with asthma.

13  
14  
15 107

## 16 17 108 **METHODS AND ANALYSIS**

### 18 19 109 **Patient and Public Involvement**

20  
21 110 No patient involved

### 22 23 111 **Study Design**

24  
25 112 EPI-ASTHMA is a population-based, nationwide, cross-sectional, prevalence study. This  
26  
27 113 study will be conducted between 2021 and 2023, and will involve 38 primary care centres  
28  
29 114 (PCC) of the Portuguese National Health Service (NHS), geographically distributed  
30  
31 115 across all mainland Portugal Health Regions (North, Centre, Lisbon Metropolitan Area,  
32  
33 116 Alentejo and Algarve). EPI-ASTHMA will be first piloted in one local health unit located  
34  
35 117 in the North region, where all study procedures will be tested; after that, it will follow the  
36  
37 118 order of approval of the ethics committee from each local health unit and regional health  
38  
39 119 administrations. The study will be conducted using a stepwise approach parallel to a  
40  
41 120 clinical practice diagnostic methodology. Firstly, subjects will be invited for a screening  
42  
43 121 telephone interview to report respiratory symptoms, those who fulfil the eligible criteria  
44  
45 122 will be invited for a clinical assessment in a mobile outpatient clinic. A sub-group of  
46  
47 123 participants with confirmed asthma diagnosis will have a follow-up after 3 months for  
48  
49 124 characterization of their asthma profile, symptoms patterns, clinical features, and  
50  
51 125 treatment patterns. This study protocol is described according to STROBE (The  
52  
53 126 Strengthening the Reporting of Observational Studies in Epidemiology Statement:  
54  
55 127 guidelines for reporting observational studies)[11].  
56  
57  
58  
59  
60

## 128 **Study population and sample size**

129 Sample size was estimated using Cochran's formula [12]:

$$130 \quad n = \frac{Z^2 P(1-P)}{d^2} \quad (1)$$

131 Where  $n$  is the sample size,  $Z$  is the statistic corresponding to level of confidence,  $P$  is  
132 expected prevalence of Severe Asthma, and  $d$  is the desired level of precision (i.e. the  
133 margin of error). Applying a  $Z = 1.96$  (i.e. 95% confidence interval), an estimated  
134 prevalence in the population of  $P = 0.42\%$  and a margin of error of  $0.15\%$  the estimated  
135 sample size is 7141. In order to obtain 7500 participants on screening we consider a  
136 stepwise approach with a 50% dropout on invitation. Therefore, around 15000 adults will  
137 be randomly selected from the Portuguese NHS database to be contacted and invited to  
138 enrol in the study. In Portugal, the majority of the population (including Portuguese  
139 nationals and legal residents) is registered in a PCC, therefore the NHS database  
140 includes almost the entire resident population in the local administrative entity (i.e.,  
141 Nomenclature of Territorial Units for Statistics-NUTS). The sample stratification was  
142 based on demographic stratification NUTS III, small regions for specific diagnoses as  
143 per EUROSTAT classification. For each NUTS III, the PCC were selected according to  
144 the feasibility of implementing the study (in total 38 PCC, 31 are part of the regional  
145 health administrations and 7 of local health units). The number of participants will be  
146 randomly selected according to the proportional allocation of each PCC. The distribution  
147 of an estimated stratified sample by NUTS III and the correspondent study Stages is  
148 presented in Table 1. The study will include male or female subjects with at least 18  
149 years old, registered in the NHS database, who give voluntary consent. Subjects with  
150 any specific physical and/or cognitive disabilities that prevented them from cooperating  
151 with the study procedures (e.g., lung function tests) and/or understanding/answering  
152 self-reported questionnaires will be excluded.

153



154 Table 1 – Distribution of the estimated stratified sample [13].

| NUTS III                                                              | Population     | Primary<br>care<br>centres | Stage 0<br>(0.15%) | Stage 1<br>(50%) | Stage 2<br>(24%) | Stage 3<br>(25%) |
|-----------------------------------------------------------------------|----------------|----------------------------|--------------------|------------------|------------------|------------------|
| Alto Minho/Cávado                                                     | 637305         | 2                          | 975                | 488              | 118              | 30               |
| Ave                                                                   | 414763         | 2                          | 635                | 317              | 77               | 19               |
| Área Metropolitana do<br>Porto                                        | 1719362        | 6                          | 2631               | 1316             | 319              | 81               |
| Alto Tâmega/Douro/Terras<br>de Trás-os-Montes                         | 389151         | 2                          | 596                | 298              | 72               | 18               |
| Tâmega e Sousa                                                        | 419811         | 2                          | 643                | 321              | 78               | 20               |
| Oeste                                                                 | 357868         | 2                          | 548                | 274              | 66               | 17               |
| Região de Aveiro                                                      | 363424         | 2                          | 556                | 278              | 67               | 17               |
| Região de Coimbra                                                     | 438228         | 2                          | 671                | 335              | 81               | 21               |
| Região de Leiria                                                      | 287040         | 1                          | 439                | 220              | 53               | 13               |
| Viseu Dão                                                             | 555628         | 2                          | 850                | 425              | 103              | 26               |
| Lafões/Beiras/Serra da<br>Estrela/Beira Baixa                         |                |                            |                    |                  |                  |                  |
| Médio Tejo/Lezíria do Tejo                                            | 474802         | 2                          | 727                | 363              | 88               | 22               |
| Área Metropolitana de<br>Lisboa                                       | 2827514        | 9                          | 4328               | 2164             | 525              | 133              |
| Alentejo Litoral/Baixo<br>Alentejo/Alto Alentejo/<br>Alentejo Central | 475674         | 2                          | 728                | 364              | 88               | 22               |
| Algarve                                                               | 440543         | 2                          | 674                | 337              | 82               | 21               |
| <b>Total</b>                                                          | <b>9801113</b> | <b>38</b>                  | <b>15000</b>       | <b>7500</b>      | <b>1819</b>      | <b>460</b>       |

155 NUTS - Nomenclature of Territorial Units for Statistics.

156 **Study procedures**

157 EPI-ASTHMA will use a stepwise approach, sequentially comprising the evaluation of  
 158 symptoms patterns, clinical features, and tests for diagnosis confirmation, that includes  
 159 the following stages (Figure 1):

- 160 ● **Stage 0- Study enrolment:** Telephone call invitation to enrol participants;

- 1  
2  
3 161 ● **Stage 1- Screening interview:** Telephone call interview to assess respiratory  
4 symptoms;  
5 162  
6  
7 163 ● **Stage 2- Diagnostic visit:** Clinical assessment, diagnostic confirmation and  
8 patient characterization;  
9 164  
10  
11 165 ● **Stage 3- Sub-group asthma characterization:** follow-up of patients with  
12 asthma (sub-group) and of patients with difficult-to-treat asthma and severe  
13 asthma, after 3 months.  
14 166  
15 167

#### 168 **Stage 0- Study enrolment**

169 Around 15,000 randomised subjects 18 years or above will receive a telephone call  
170 invitation for enrolment in the study, to secure a sample size of 7500 participants for the  
171 next stage (assuming an acceptance of 50%)[14]. If needed, a second round of  
172 telephone calls will also be made to complete the number of patients in each region.  
173 Trained clinical secretaries will conduct this stage by following a semi-structured guide  
174 during the telephone call. A screening log of potential eligible participants will be  
175 completed to document the main reasons for participants not entering the study. Subjects  
176 who fulfil the study eligibility criteria and give their oral consent will be contacted in Stage  
177 1.

#### 178 **Stage 1- Screening interview**

179 A computer-assisted telephone screening interview will be performed to 7500  
180 participants. The interview will include validated patient-reported outcome measures for  
181 screening asthma [15] and chronic obstructive pulmonary disease (COPD) [16],  
182 dyspnoea [17] and assessment of physical activity [18,19], among other questions  
183 formulated by the researchers (Table 2). At this stage participants will be considered  
184 eligible and invited to participate in Stage 2 if they have, at least, one positive response  
185 in the Adult Asthma Score (A2 Score) [15], i.e., medical history of asthma or asthma  
186 medication intake or asthma symptoms. For quality control, 5% of not eligible participants  
187 (with a negative score) will also be invited to participate in Stage 2. Interviews will be

1  
2  
3 188 performed by a centralised team of trained and experienced interviewers. Each  
4  
5 189 participant will be contacted for at least ten attempts during different occasions before  
6  
7 190 being considered excluded. Prior to any question, participants will be asked to reinforce  
8  
9 191 their oral consent to participate. A pilot study with 12 individuals was conducted to assess  
10  
11 192 the clarity and feasibility of the screening interview before starting the data collection  
12  
13 193 [20]. The duration of each interview was no longer than 17 minutes.

## 16 194 **Stage 2 – Diagnostic visit**

17  
18  
19 195 The diagnostic visit will be conducted in a mobile outpatient clinic, located, whenever  
20  
21 196 possible, in the close vicinity of each PCC. At this stage, participants will give a written  
22  
23 197 informed consent before any study-related procedures. Stage 2 is expected to include  
24  
25 198 1800 participants, about 20% of participants from Stage 1 who fulfil the eligibility criteria,  
26  
27 199 plus 5% of participants for quality control. A detailed clinical assessment will be  
28  
29 200 performed, including clinical history, physical examination, lung function tests, blood  
30  
31 201 count and inflammatory biomarkers testing and patient-reported outcome measures  
32  
33 202 (Table 2). The clinical assessment will be carried out by a physician and the diagnostic  
34  
35 203 tests by an experienced team to assure the quality and the harmonisation of procedures.  
36  
37 204 All patients will be provided with a letter addressed to their primary care physician,  
38  
39 205 containing the results of their clinical evaluation. Patients with asthma will also be invited  
40  
41 206 to install and use the CARATm app (“Características Auto-reportadas de Asma em  
42  
43 207 Tecnologias Móveis”) in their daily life. CARATm is a Portuguese health mobile app  
44  
45 208 developed to collect clinical data from patients with asthma, such as asthma control and  
46  
47 209 medication adherence, which is also interoperable with the Portuguese Severe Asthma  
48  
49 210 Registry (asmagrave.pt).

52 211

## 54 212 **Stage 3- Sub-group asthma characterization**

57 213 This stage is expected to include 460 participants: a randomised sample of patients with  
58  
59 214 asthma, and all patients identified with difficult-to-treat or severe asthma. Patients with  
60

1  
2  
3 215 difficult-to-treat and severe asthma will be defined according to GINA[21]. This stage  
4  
5 216 takes place 3-months after the diagnostic visit and consists of a review of patients'  
6  
7 217 electronic health records, a follow-up telephone call to the patient, and extraction of  
8  
9 218 CARATm app data. The review of patients' electronic health records by a physician of  
10  
11 219 their PCC will ensure an asthma control assessment on two different time points, and  
12  
13 220 will confirm the treatment profile for an adequate GINA severity classification [7] (Table  
14  
15  
16 221 2).

222

223

Table 2. Summary of the data collection per study's stage.

224

|                                                     | Stage 1 | Stage 2 | Stage 3 |
|-----------------------------------------------------|---------|---------|---------|
| Sociodemographic and anthropometric characteristics | x       |         |         |
| Brief PA assessment                                 | x       | x       |         |
| Respiratory symptoms (wheeze, breathlessness)       | x       | x       | x       |
| CAPTURE                                             | x       |         |         |
| mMRC                                                | x       |         |         |
| Diagnosis of chronic respiratory disease            | x       | x       | x       |
| Comorbidities and allergies                         | x       | x       | x       |
| Smoking habits and ETS                              | x       | x       |         |
| A2 Score                                            | x       |         |         |
| Family history of asthma                            | x       | x       |         |
| Age of asthma onset                                 |         | x       |         |
| Inhaler prescription/use                            | x       |         |         |
| Mini-AQLQ                                           |         | x       |         |
| EQ-5D                                               |         | x       |         |
| Signs of asthma                                     |         | x       |         |
| CARAT                                               |         | x       | x       |
| Asthma control (according to GINA)                  |         | x       | x       |
| Asthma pharmacological treatment                    |         | x       | x*      |
| Inhalation technique                                |         | x       |         |
| Adherence to inhaled medication                     |         | x       | x*      |
| Other treatments                                    |         | x       | x       |
| Number of exacerbations                             |         | x       | x*      |
| Number of visits to emergency room                  |         | x       | x*      |

1  
2  
3  
4  
5  
6  
7  
8  
9  
10  
11  
12  
13  
14  
15  
16  
17  
18  
19  
20  
21  
22  
23  
24  
25  
26  
27  
28  
29  
30  
31  
32  
33  
34  
35  
36  
37  
38  
39  
40  
41  
42  
43  
44  
45  
46  
47  
48  
49  
50  
51  
52  
53  
54  
55  
56  
57  
58  
59  
60

|                                                           |   |   |    |
|-----------------------------------------------------------|---|---|----|
| Number of hospital admissions and length of hospital stay |   | x | x* |
| Number of unscheduled consultations                       |   | x | x* |
| Number of consultations primary care team                 |   | x | x* |
| Referral for specialist care                              |   | x | x* |
| Standard measurements (blood pressure, height, weight)    |   | x |    |
| Pre-BD and post-BD lung function                          |   | x |    |
| Pulmonary diagnostic tests (previously performed)         |   |   | x  |
| FeNO                                                      |   | x |    |
| Peripheral blood eosinophil and neutrophil counts         |   | x |    |
| Use of health and fitness apps                            | x | x |    |
| CARATm app use and opinion                                |   |   | x  |

A2 Score= A2 adult asthma score[15]; CAPTURE= COPD Assessment in Primary Care to Identify Undiagnosed Respiratory Disease and Exacerbation Risk [16]; mMRC=Modified British Medical Research Council [17]; PA = Brief physical activity assessment [18,19]; Mini-AQLQ=Mini Asthma Quality of Life Questionnaire[22,23]; EQ-5D=European Quality of Life Five Dimension [24]; CARAT=Control of Allergic Rhinitis and Asthma Test [25]; pre-BD and post-BD=Spirometry pre- and post-bronchodilator [26]; FeNO=Fractional exhaled nitric oxide [27]; || \*In the previous 3 and 12 months.

225

## 226 Data storage, blinding and statistical analysis plan

227 Participants will be anonymized with a unique subject ID and their data will be  
228 anonymously stored in an appropriately secured server. In order to minimise diagnostic  
229 bias, researchers, data collectors and participants will be blinded to patient eligibility  
230 throughout data collection during Stage 2. Over the stages, data will be collected for a  
231 specific electronic case report form (e-CRF) by using blended data (primary and  
232 secondary data).

233 Statistical analysis will allow the characterization of the study population and the  
234 estimation of each study's endpoints. The prevalence of asthma, difficult-to-treat and  
235 severe asthma with the respective 95% confidence intervals (95% CI) will be calculated  
236 in relation to the entire study population (Stage 1). Descriptive statistics such as i) central  
237 tendency (e.g. mode, median or mean); ii) localisation (e.g. percentile); iii) dispersion  
238 (e.g. interquartile range, standard deviation) and iv) distribution (e.g. skewness, kurtosis)  
239 will be used, depending on the type of each variable, to characterise the total sample or

1  
2  
3 240 subgroups. Associations between two quantitative variables will be calculated using the  
4  
5 241 Pearson's correlation coefficient or Spearman correlation coefficient, in case of normality  
6  
7 242 assumption are not verified. Association of two categorical variables will be determined  
8  
9 243 using the Chi-Square test or Fisher Exact test. Continuous variables between two groups  
10  
11 244 will be compared with a t-test for independent samples or Mann-Whitney test, whereas  
12  
13 245 for comparisons among 3 or more groups an ANOVA or Kruskal-Wallis test will be used.  
14  
15 246 Null-hypothesis statistical testing will also be applied in an exploratory manner to identify  
16  
17 247 any relationship patterns among variables. Subgroup analysis per each asthma control  
18  
19 248 level, GINA treatment step, Short-Acting Beta Agonists (SABA) overuse among others,  
20  
21 249 will also be conducted. Measurements of effect size will be presented and confidence  
22  
23 250 intervals at 95% will be estimated to account for the uncertainty of the sample estimates.  
24  
25 251 Interim analysis will be conducted per region after all stages are completed.

26  
27  
28  
29 252 For the analysis of factors associated with asthma, difficult-to-treat asthma and severe  
30  
31 253 asthma, logistic regression models will be explored, taking into consideration these as  
32  
33 254 dependent variables and sociodemographic, clinical, among other variables, as  
34  
35 255 independent variables. The variables to be included in the multivariate model will be  
36  
37 256 selected from the univariate analyses, when p-value  $<0.100$ , those that do not meet  
38  
39 257 these criteria, but are considered clinically relevant, will also be possible candidates. The  
40  
41 258 final model will be analysed from two perspectives: 1) the calibration using the Hosmer-  
42  
43 259 Lemeshow goodness of fit test, and 2) the discrimination, using ROC curves and the  
44  
45 260 respective area under the curve. All results will be considered statistically significant  
46  
47 261 when p-value  $<0.05$ .

48  
49  
50 262

## 51 52 53 263 **DISCUSSION**

54  
55 264  
56  
57  
58  
59  
60

1  
2  
3 265 The EPI-ASTHMA study will address knowledge gaps in the epidemiology and  
4  
5 266 characterisation of asthma in mainland Portugal, using a multicentre approach that  
6  
7 267 combines different data collection methods, including a mHealth solution. Furthermore,  
8  
9 268 it will provide a more complete picture of the prevalence of difficult-to-treat and severe  
10  
11 269 asthma in Portugal, and will allow a better understanding of these patients'  
12  
13 270 characteristics, treatment profile and healthcare resource use. Further knowledge on the  
14  
15 271 distribution of severity and characteristics of patients in each group will better support  
16  
17 272 clinical management of the disease and inform personalised health policies for a smarter  
18  
19 273 allocation of the needed healthcare resources. This ambitious study is aligned with the  
20  
21 274 global need of epidemiological studies to monitor the trends in the prevalence of asthma,  
22  
23  
24 275 which is vital to ensure that health policies fit the populations' needs [2,28,29].  
25

26  
27 276 The study design is one of its strengths. The combination of standardised questionnaires  
28  
29 277 with a standardised clinical evaluation, including lung function tests will allow a more  
30  
31 278 accurate diagnosis and characterisation of asthma. However, few limitations and  
32  
33 279 potential risks must be acknowledged. The definition of difficult-to-treat and severe  
34  
35 280 asthma will be based on the GINA treatment steps (4-5) and the assessment of asthma  
36  
37 281 control during the study Stages 2 and 3, which is only 3-months apart. An optimised  
38  
39 282 management during the follow-up period was not included, which is also part of the GINA  
40  
41 283 criteria to distinguish these asthma subgroups. This will probably be a source of error in  
42  
43 284 the estimation of the prevalence of these sub-groups, linked to the observational nature  
44  
45 285 of this study. The 38 PCC will be conveniently selected, which can be seen as a source  
46  
47 286 of bias. Yet, we considered the geographic areas and population distribution of each  
48  
49 287 Portuguese region as well as their interest to participate and willingness to collect data  
50  
51 288 and not only based on previous asthma research experience which will preserve the  
52  
53 289 study real-world nature. Clinical secretaries (Stage 0) and physicians (Stage 2 and 3)  
54  
55 290 will collaborate across different country's regions, which may introduce some  
56  
57 291 heterogeneity in data collection. Nevertheless, both clinical secretaries and physicians  
58  
59  
60

1  
2  
3 292 will be previously trained and continuously motivated by the management team, which  
4  
5 293 will be available to clarify doubts on a 24/7 basis. To deal with possible risks, the study's  
6  
7 294 steering committee will supervise the execution and will take academic responsibility for  
8  
9 295 the study. Another limitation is the need for this multicentre study to be approved by the  
10  
11 296 ethics committees responsible for each regional health administration/local health unit.  
12  
13 297 Although all applications will be similar in their content, they will differ in a number of  
14  
15 298 aspects to comply with each institution's formal requirements, resulting in additional  
16  
17 299 complexity and may hinder the compliance with the study timeline. To mitigate these  
18  
19 300 risks, an experienced contracted research organisation that knows the specificities of  
20  
21 301 each administration/health unit is supporting us through all the process.

22  
23  
24 302 EPI-ASTHMA will be managed combining traditional management methodologies with  
25  
26 303 an "agile" approach [30] using the SCRUM framework on Jira software. This combination  
27  
28 304 is expected to fulfil the need to make the study adaptable and to anticipate future needs  
29  
30 305 that are important and can be forgotten due to the dimension of the study.

## 306 **Conclusion**

307  
308 EPI-ASTHMA will be the first population-based study in Portugal to determine the  
309  
310 prevalence of asthma, difficult-to-treat and severe asthma and to better understand the  
311  
312 patient's disease characteristics, treatment patterns and use of healthcare resources.  
313  
314 The knowledge generated by this nationwide robust study has great potential to inform  
315  
316 health policies and to improve the clinical outcomes of patients with asthma in Portugal.

## 317 **Ethics and dissemination:**

318  
319 The study will follow the tenants of the Declaration of Helsinki and the Oviedo  
320  
321 Convention. Ethical approvals and data privacy clearance for the study were obtained  
322  
323 by the Ethics Committee and Data Protection Officer of the local health unit of  
324  
325 Matosinhos, Porto (ULSM; 38/CES/JAS, March 12th ,2021), Alto Minho (ULSAM;  
326  
327 38/2021/CES, June 17th, 2021) and the Regional Health Administration of Lisbon and  
328  
329



1  
2  
3 319 Vale do Tejo (ARSLVT; 035/CES/INV/2021; December 3rd 2021) and is under revision  
4  
5 320 in the remain regional ethical committees for health administration/local health units. All  
6  
7 321 participants will received both verbal and written information explaining the purpose of  
8  
9 322 the study and they will have to provided verbal and written informed consent. Results will  
10  
11 323 be presented at both national and international scientific meetings and published in peer-  
12  
13 324 reviewed journals. Seasonal newsletters will be provided to the funders of the study as  
14  
15 325 well as all the involved participants.  
16  
17  
18 326

## 327 **Statements**

### 328 Patient consent for publication

329 Not applicable.  
30  
31 330

### 331 Authors' contributions

332 JCA, JAF and FB conceptualised the study. CJ wrote the statistical analysis plan and  
333 PT conducted the sample size calculation. CJ and CJO wrote the first draft of the  
334 manuscript. All authors contributed to and refined the manuscript for scientific content.  
335 All authors read and approved the final version of the manuscript.  
336

### 337 Competing interests

338 JCS reports Advisory Board from Boheringer Ingelheim, personal fees and Advisory  
339 Board from GSK, grants, personal fees and Advisory Board from AstraZeneca, personal  
340 fees and Advisory Board from Bial, non-financial support from Mundipharma, personal  
341 fees from Sanofi, Advisory Board from Novartis, outside the submitted work. JAF  
342 declares grants from or research agreements with AstraZeneca, Mundipharma, Sanofi  
343 Regeneron and Novartis. Personal fees for lectures and attending advisory boards from

1  
2  
3 344 AstraZeneca, GSK, Mundipharma, Novartis, Sanofi Regeneron and TEVA. MP and FB  
4  
5 345 are employees of AstraZeneca, Produtos Farmacêuticos. The remaining authors declare  
6  
7 346 no conflicts of interest.  
8

9 347

10  
11 348 Funding

12  
13  
14 349 Funding for this study was provided by AstraZeneca. N/A for the award/grant number.  
15  
16

17 350

18  
19  
20 351 **REFERENCES**

- 21  
22  
23 352 1. Chung KF, Wenzel SE, Brozek JL, Bush A, Castro M, Sterk PJ, et al. International  
24  
25 353 ERS/ATS guidelines on definition, evaluation and treatment of severe asthma. Eur  
26  
27 354 Respir J. 2014;43: 343–373.
- 28  
29  
30 355 2. Asher MI, García-Marcos L, Pearce NE, Strachan DP. Trends in worldwide asthma  
31  
32 356 prevalence. Eur Respir J. 2020;56.
- 33  
34  
35 357 3. Sá-Sousa A, Jacinto T, Azevedo LF, Morais-Almeida M, Robalo-Cordeiro C,  
36  
37 358 Bugalho-Almeida A, et al. Operational definitions of asthma in recent  
38  
39 359 epidemiological studies are inconsistent. Clin Transl Allergy. 2014;4: 24.
- 40  
41  
42 360 4. Sa-Sousa A, Morais-Almeida M, Azevedo LF, Carvalho R, Jacinto T, Todo-Bom A,  
43  
44 361 et al. Prevalence of asthma in Portugal - The Portuguese National Asthma Survey.  
45  
46 362 Clin Transl Allergy. 2012;2:15.
- 47  
48  
49 363 5. de Sousa JC, Santo ME, Colaço T, Almada-Lobo F, Yaphe J. Asthma in an urban  
50  
51 364 population in Portugal: a prevalence study. BMC Public Health. 2011;11: 347.  
52  
53 365 doi:10.1186/1471-2458-11-347
- 54  
55  
56 366 6. da Saúde D-G. Programa Nacional para as Doenças Respiratórias 2017. Lisboa:  
57  
58 367 Direção-Geral da Saúde; 2017.  
59  
60

- 1  
2  
3 368 7. Global Initiative for Asthma. Global Strategy for Asthma Management and  
4  
5 369 Prevention. 2021. Available on the GINA website: <https://ginasthma.org/>  
6  
7  
8 370 8. Sá-Sousa A, Amaral R, Morais-Almeida M, Araújo L, Azevedo LF, Bugalho-  
9  
10 371 Almeida A, et al. Asthma control in the Portuguese National Asthma Survey. Rev  
11  
12 372 Port Pneumol. 2015;21: 209–213.  
13  
14  
15 373 9. Narasimhan K. Difficult to Treat and Severe Asthma: Management Strategies. Am  
16  
17 374 Fam Physician. 2021;103: 286–290.  
18  
19  
20 375 10. Ryan D, Murphy A, Ställberg B, Baxter N, Heaney LG. “SIMPLES”: a structured  
21  
22 376 primary care approach to adults with difficult asthma. Prim Care Respir J. 2013;22:  
23  
24 377 365–373.  
25  
26  
27 378 11. von Elm E, Altman DG, Egger M, Pocock SJ, Gøtzsche PC, Vandenbroucke JP, et  
28  
29 379 al. The Strengthening the Reporting of Observational Studies in Epidemiology  
30  
31 380 (STROBE) statement: guidelines for reporting observational studies.  
32  
33 381 Epidemiology. 2007;18: 800–804.  
34  
35  
36 382 12. Kasiulevičius V, Šapoka V, Filipavičiūtė R. Sample size calculation in  
37  
38 383 epidemiological studies. Gerontologija. 2006;7: 225–231.  
39  
40  
41 384 13. Instituto Nacional de Estatística. Censos 2011. XV Recenseamento Geral da  
42  
43 385 População: V Recenseamento Geral da Habitação. Resultados definitivos:  
44  
45 386 Portugal. Lisboa: INE, 2012. IV Recenseamento Geral de Habitação. Lisboa,  
46  
47 387 Portugal: Instituto Nacional de Estatística; 2012.  
48  
49  
50 388 14. Lopes C, Torres D, Oliveira A, Severo M, Alarcão V, Guiomar S, et al. Inquérito  
51  
52 389 Alimentar Nacional e de Atividade Física IAN-AF 2015-2016: relatório de  
53  
54 390 resultados. 2017.  
55  
56  
57 391 15. Sá-Sousa A, Pereira AM, Almeida R, Araújo L, Couto M, Jacinto T, et al. Adult  
58  
59  
60

- 1  
2  
3 392 Asthma Scores-Development and Validation of Multivariable Scores to Identify  
4  
5 393 Asthma in Surveys. *J Allergy Clin Immunol Pract*. 2019;7: 183–190.e6.  
6  
7  
8 394 16. Martinez FJ, Mannino D, Leidy NK, Malley KG, Bacci ED, Barr RG, et al. A New  
9  
10 395 Approach for Identifying Patients with Undiagnosed Chronic Obstructive  
11  
12 396 Pulmonary Disease. *Am J Respir Crit Care Med*. 2017;195: 748–756.  
13  
14  
15 397 17. Standardized Questionnaires on Respiratory Symptoms. *Br Med J*. 1960;2: 1665–  
16  
17 398 1665.  
18  
19  
20 399 18. Cruz J, Jácome C, Oliveira A, Paixão C, Rebelo P, Flora S, et al. Construct validity  
21  
22 400 of the brief physical activity assessment tool for clinical use in COPD. *Clin Respir*  
23  
24 401 *J*. 2021;15: 530–539.  
25  
26  
27 402 19. Marshall AL, Smith BJ, Bauman AE, Kaur S. Reliability and validity of a brief  
28  
29 403 physical activity assessment for use by family doctors. *Br J Sports Med*. 2005;39:  
30  
31 404 294–7; discussion 294–7.  
32  
33  
34  
35 405 20. van Teijlingen E, Hundley V. The importance of pilot studies. *Nurs Stand*. 2002;16:  
36  
37 406 33–36.  
38  
39  
40 407 21. Global Initiative for Asthma. A new Pocket Guide, “Diagnosis and Management of  
41  
42 408 Difficult-to-treat and Severe Asthma in adolescent and adult patients.”, 2021.  
43  
44 409 Available on the GINA website: <https://ginasthma.org/>  
45  
46  
47 410 22. Ferreira PL, Mendonça C, Newparth N, Mata p, Juniper EF, Mear I. Quality of life  
48  
49 411 in asthma: cultural adaptation of Juniper’s AQLQ to Portuguese. 1998. p.7 (7):  
50  
51 412 590.  
52  
53  
54 413 23. Juniper EF, Guyatt GH, Cox FM, Ferrie PJ, King DR. Development and validation  
55  
56 414 of the Mini Asthma Quality of Life Questionnaire. *Eur Respir J*. 1999;14: 32–38.  
57  
58  
59 415 24. Ferreira PL, Ferreira LN, Pereira LN. Contributos para a Validação da Versão  
60

- 1  
2  
3 416 Portuguesa do EQ-5D. *Acta Med Port.* 2013;26: 664.  
4  
5  
6 417 25. Fonseca JA, Nogueira-Silva L, Morais-Almeida M, Azevedo L, Sa-Sousa A,  
7  
8 418 Branco-Ferreira M, et al. Validation of a questionnaire (CARAT10) to assess  
9  
10 419 rhinitis and asthma in patients with asthma. *Allergy.* 2010;65: 1042–1048.  
11  
12  
13 420 26. Graham BL, Steenbruggen I, Miller MR, Barjaktarevic IZ, Cooper BG, Hall GL, et  
14  
15 421 al. Standardization of Spirometry 2019 Update. An Official American Thoracic  
16  
17 422 Society and European Respiratory Society Technical Statement. *Am J Respir Crit*  
18  
19 423 *Care Med.* 2019;200: e70–e88.  
20  
21  
22 424 27. Dweik RA, Boggs PB, Erzurum SC, Irvin CG, Leigh MW, Lundberg JO, et al. An  
23  
24 425 official ATS clinical practice guideline: interpretation of exhaled nitric oxide levels  
25  
26 426 (FENO) for clinical applications. *Am J Respir Crit Care Med.* 2011;184: 602–615.  
27  
28  
29 427 28. Bousquet J, Khaltaev N, Cruz AA: Global surveillance, prevention and control of  
30  
31 428 Chronic Respiratory Diseases: A comprehensive approach. Switzerland: World  
32  
33 429 Health Organization; 2007.  
34  
35  
36 430 29. Global Asthma Network. The Global Asthma Report 2018. Auckland, New  
37  
38 431 Zealand: 2018.  
39  
40  
41 432 30. Pavlović, K. B., Berić, I., & Berezljjev, L. AGILE TRANSFORMATION IN CLINICAL  
42  
43 433 RESEARCH. *European Project Management Journal.* 2018;8: 65–70.  
44  
45  
46  
47 434  
48  
49

## 435 **Figures**

436 **Figure 1:** Flow of participants through study's stages. SuA - severe and difficult to treat  
437 asthma.

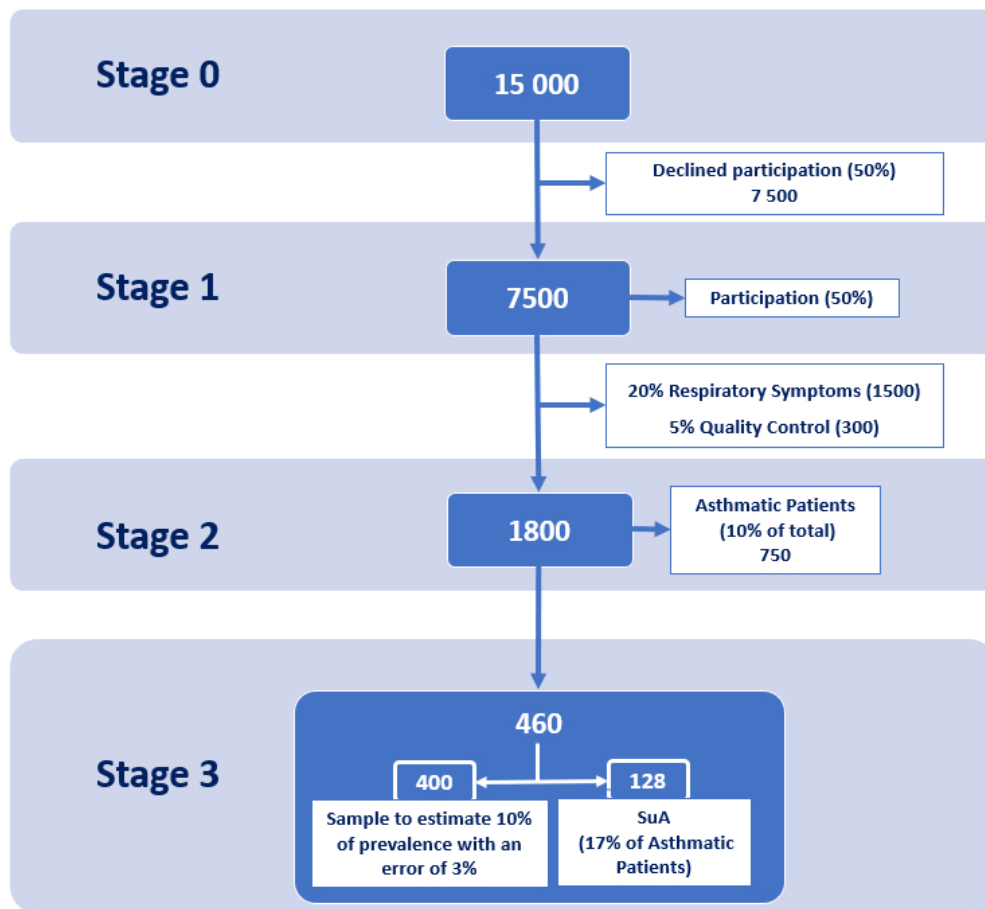

Figure 1: Flow of participants through study’s stages. SuA - severe and difficult to treat asthma.

62x57mm (300 x 300 DPI)

# BMJ Open

## EPI-ASTHMA study protocol - a population-based multicentre stepwise study on the prevalence and characterisation of patients with asthma according to disease severity in Portugal

|                                 |                                                                                                                                                                                                                                                                                                                                                                                                                                                                                                                                                                                                                                                                                                                 |
|---------------------------------|-----------------------------------------------------------------------------------------------------------------------------------------------------------------------------------------------------------------------------------------------------------------------------------------------------------------------------------------------------------------------------------------------------------------------------------------------------------------------------------------------------------------------------------------------------------------------------------------------------------------------------------------------------------------------------------------------------------------|
| Journal:                        | <i>BMJ Open</i>                                                                                                                                                                                                                                                                                                                                                                                                                                                                                                                                                                                                                                                                                                 |
| Manuscript ID                   | bmjopen-2022-064538.R1                                                                                                                                                                                                                                                                                                                                                                                                                                                                                                                                                                                                                                                                                          |
| Article Type:                   | Protocol                                                                                                                                                                                                                                                                                                                                                                                                                                                                                                                                                                                                                                                                                                        |
| Date Submitted by the Author:   | 03-Aug-2022                                                                                                                                                                                                                                                                                                                                                                                                                                                                                                                                                                                                                                                                                                     |
| Complete List of Authors:       | Jácome, Cristina; Center for Health Technology and Services Research<br>Brito, Dinis; USF 7fontes<br>João, Catarina; University of Porto,<br>Lopes, Filipa; MEDIDA<br>Santos, Janete; Center for Health Technology and Services Research<br>Amorim, Liliana; Digital Medicine Center P5<br>Barbosa, Maria João; University of Minho; Gualtar Family Health Unit<br>Pardal, Marisa; AstraZeneca<br>Teixeira, Pedro; University of Minho - Gualtar Campus,<br>Bernardo, Filipa; AstraZeneca<br>Fonseca, Joao A.; University of Porto<br>Correia-de-Sousa, Jaime; Life and Health Sciences Research Institute (ICVS)/3B's — PT Government Associate Laboratory, University of Minho; Horizonte Family Health Unit, |
| <b>Primary Subject Heading</b>: | Respiratory medicine                                                                                                                                                                                                                                                                                                                                                                                                                                                                                                                                                                                                                                                                                            |
| Secondary Subject Heading:      | Research methods                                                                                                                                                                                                                                                                                                                                                                                                                                                                                                                                                                                                                                                                                                |
| Keywords:                       | Asthma < THORACIC MEDICINE, EPIDEMIOLOGY, Chronic airways disease < THORACIC MEDICINE                                                                                                                                                                                                                                                                                                                                                                                                                                                                                                                                                                                                                           |
|                                 |                                                                                                                                                                                                                                                                                                                                                                                                                                                                                                                                                                                                                                                                                                                 |

SCHOLARONE™  
Manuscripts

1  
2  
3  
4 **1 EPI-ASTHMA study protocol - a population-based multicentre stepwise study on**  
5  
6 **2 the prevalence and characterisation of patients with asthma according to**  
7  
8 **3 disease severity in Portugal**

9  
10 4 Cristina Jácome<sup>1,2</sup>, Dinis Brito<sup>3,4</sup>, Catarina João<sup>1</sup>, Filipa Lopes<sup>5</sup>, Janete Santos<sup>1</sup>, Liliana  
11  
12 5 Amorim<sup>6</sup>, Maria João Barbosa<sup>3,9</sup>, Marisa Pardal<sup>7</sup>, Pedro Teixeira<sup>3,6</sup>, Filipa Bernardo<sup>7</sup>,  
13  
14 6 João Almeida Fonseca<sup>1,2,5,8</sup>, Jaime Correia de Sousa<sup>3</sup>  
15  
16  
17  
18

19 **8 Affiliations:**

20  
21 9 1- Center for Health Technology and Services Research (CINTESIS), Faculty of  
22  
23 10 Medicine, University of Porto, Porto, Portugal;

24  
25  
26 11 2- Department of Community Medicine, Information and Health Decision Sciences  
27  
28 12 (MEDCIDS), Faculty of Medicine, University of Porto, Porto, Portugal

29  
30  
31 13 3- Life and Health Sciences Research Institute (ICVS), School of Medicine, University of  
32  
33 14 Minho, Braga, Portugal

34  
35  
36 15 4- Sete Fontes, Family Health Unit, Braga, Portugal

37  
38  
39 16 5- MEDIDA, Porto, Portugal

40  
41  
42 17 6- Digital Medicine Center P5, Braga, Portugal

43  
44  
45 18 7- AstraZeneca, Queluz, Lisboa, Portugal

46  
47  
48 19 8- Allergy Unit, Hospital and Institute CUF, Porto, Portugal

49  
50  
51 20 9-Gualtar Family Health Unit, Braga, Portugal

52  
53 21 Corresponding author: Cristina Jácome; Center for Health Technology and Services  
54  
55 22 Research (CINTESIS), Department of Community Medicine, Information and Health  
56  
57 23 Decision Sciences (MEDCIDS), Faculty of Medicine, University of Porto, Portugal; e-  
58  
59 24 mail: cristinajacome.ft@gmail.com  
60



25

**ABSTRACT**

**Introduction:** In Portugal as in other countries, data on the epidemiology of asthma are mainly grounded in questionnaire studies. Additionally, the detailed characterisation of asthma in terms of disease severity, control and phenotypes remain scarce. Studies assessing the prevalence of asthma and its sub-groups using accurate methods are needed. This study aims to determine the prevalence of asthma, difficult-to-treat and severe asthma, and to evaluate sociodemographic and clinical characteristics of those patients, in mainland Portugal.

**Methods and analysis:** A population-based nationwide study with a multicentre stepwise approach will be conducted between 2021-2023 in 38 primary care centres of the Portuguese National Health Service. The stepwise approach will comprise 4 Stages: Stage 0-telephone call invitation to adult subjects ( $\geq 18$  years) randomly selected ( $n \sim 15000$ ); Stage 1-telephone screening interview assessing the participants' respiratory symptoms ( $n \sim 7500$ ); Stage 2- diagnostic visit, including physical examination, diagnostic tests (e.g., spirometry, fraction of exhaled nitric oxide, blood eosinophil count), and patient-reported outcome measures for diagnostic confirmation of those identified with possible asthma at Stage 1 ( $n \sim 1800$ ); Stage 3-further evaluation of patients with asthma and of patients with difficult-to-treat asthma and severe asthma, after 3 months ( $n \sim 460$ ). At Stage 3, data will be collected from a review of the patient's electronic health records, a follow-up telephone call and the CARATm app database. The prevalence of asthma, difficult-to-treat and severe asthma will be determined as the percentage of patients with asthma confirmed from the overall population (Stage 1). For the analysis of factors associated with asthma, difficult-to-treat and severe asthma, logistic regression models will be explored.

1  
2  
3 50 **Ethics and dissemination:** Ethical approvals for the study were obtained from the ethics  
4  
5 51 committee of the local health unit of Matosinhos, Porto (38/CES/JAS), Alto Minho  
6  
7 52 (38/2021/CES) and the regional health administration of Lisbon-Vale do Tejo  
8  
9 53 (035/CES/INV/2021). Results will be published in peer-reviewed journals.  
10

11 54  
12  
13 55 Trial registration: ClinicalTrials.gov, NCT05169619. Registered on December 27th 2021.  
14  
15  
16 56

17  
18  
19 57 Strengths and limitations of this study

- 20  
21  
22 58 - The design of this study is based on a stepwise approach, divided in 4 stages,  
23  
24 59 that mimics the clinical practice diagnostic pathway for asthma.  
25  
26 60 - This study allows a reliable diagnosis and characterization of asthma patients  
27  
28 61 through the use of questionnaires together with clinical examination that includes  
29  
30 62 lung function assessment.  
31  
32 63 - A mHealth application to engage patients on self-management of their disease  
33  
34 64 and to improve completeness of the data collection is used.  
35  
36 65 - The 3-month follow-up with lack of optimised management might be a source of  
37  
38 66 error in the estimation of the prevalence of asthma sub-groups.  
39  
40 67 - Heterogeneity in data collection across the country regions may prove  
41  
42 68 challenging and a possible source of bias.  
43  
44

45 69 **Keywords:** disease severity, severe asthma, difficult-to-treat asthma, epidemiology  
46  
47  
48 70  
49  
50  
51 71  
52  
53  
54 72  
55  
56 73  
57  
58  
59 74  
60

## 75 Introduction

76

77 Asthma is a common chronic disease affecting all age groups. Worldwide, it is estimated  
78 that about 5 to 10% of people have asthma [1], with a significant wide variation across  
79 regions and countries [2]. To date, epidemiological data on prevalence have used  
80 heterogeneous methodologies due to difficulties in defining and diagnosing asthma,  
81 leading to highly variable estimates of asthma prevalence [3]. Some studies used non-  
82 standardised questionnaires, others included participants based on the assessment of  
83 lung function or responsiveness to bronchodilators. In Portugal, the 2011 National  
84 Asthma Survey was based on telephone interviews and indicated a prevalence of 6.8%  
85 [4]. Yet, previous studies have estimated a prevalence between 3.3 and 15% [5].  
86 Furthermore, similarly to the USA and Denmark Asthma Surveys, the 2005-2006  
87 Portuguese Health Survey, suggested that there is an underdiagnosis of asthma,  
88 particularly in the male population and in the country's southern regions [5]. The  
89 Portuguese National Program for Respiratory Diseases maintains strategic research  
90 objectives in epidemiological surveillance both in asthma prevalence and its  
91 underdiagnosis [6], which is in line with the recommendations from the Global Initiative  
92 for Asthma (GINA) [7].

93 Additionally, national data on the characterisation of patients with asthma, in terms of  
94 severity and control, remain lacking [8]. Worldwide, it is estimated that up to 17% of  
95 patients have difficult-to-treat and 3.7% have severe asthma [9], which are more likely to  
96 experience life-threatening exacerbations and consume additional healthcare resources.  
97 It is important to differentiate these severity groups, as difficult-to-treat asthma might be  
98 manageable in primary health care, eventually with concomitant support from a  
99 secondary care specialist, whereas severe asthma requires a specialised second or  
100 tertiary care approach [10]. Knowledge on the distribution of severity and characteristics  
101 of patients in each group will better support clinical management of the disease and will

1  
2  
3 102 inform personalised health policies for a future and smarter allocation of healthcare  
4  
5 103 resources.

6  
7  
8 104 The primary aim of this study is to determine the prevalence of asthma, difficult-to-treat  
9  
10 105 and severe asthma in Portugal. The secondary aims are to evaluate the  
11  
12 106 sociodemographic and clinical characteristics of patients with asthma.

13  
14  
15 107

## 16 17 108 **METHODS AND ANALYSIS**

### 18 19 109 **Patient and Public Involvement**

20  
21 110 No patient involved

### 22 23 111 **Study Design**

24  
25  
26  
27 112 EPI-ASTHMA is a population-based, nationwide, cross-sectional, prevalence study. This  
28  
29 113 study will be conducted between 2021 and 2023, and will involve 38 primary care centres  
30  
31 114 (PCC) of the Portuguese National Health Service (NHS), geographically distributed  
32  
33 115 across all mainland Portugal Health Regions (North, Centre, Lisbon Metropolitan Area,  
34  
35 116 Alentejo and Algarve). The study will be conducted using a stepwise approach parallel  
36  
37 117 to a clinical practice diagnostic methodology. Firstly, subjects will be invited for a  
38  
39 118 screening telephone interview to report respiratory symptoms, those who fulfil the eligible  
40  
41 119 criteria will be invited for a clinical assessment in a mobile outpatient clinic. A sub-group  
42  
43 120 of participants with confirmed asthma diagnosis will have a follow-up after 3 months for  
44  
45 121 characterization of their asthma profile, symptoms patterns, clinical features, and  
46  
47 122 treatment patterns. EPI-ASTHMA was first piloted in one local health unit located in the  
48  
49 123 North region from May to October 2021, where all study procedures were tested; after  
50  
51 124 which, implementation is planned to follow the order of approval of the ethics committee  
52  
53 125 from each local health unit and regional health administrations. Currently, the study has  
54  
55 126 been concluded in 4 PCC in Northern Portugal.  
56  
57  
58  
59  
60

1  
2  
3 127 This study protocol is described according to STROBE (The Strengthening the Reporting  
4  
5 128 of Observational Studies in Epidemiology Statement: guidelines for reporting  
6  
7 129 observational studies) statement [11].  
8  
9

10 130

### 13 131 **Study population and sample size**

14  
15  
16 132 Sample size was estimated using Cochran's formula [12]:  
17

18  
19 133 
$$n = \frac{Z^2 P(1-P)}{d^2} \quad (1)$$
  
20  
21

22 134 Where  $n$  is the sample size,  $Z$  is the statistic corresponding to level of confidence,  $P$  is  
23  
24 135 expected prevalence of Severe Asthma, and  $d$  is the desired level of precision (i.e. the  
25  
26 136 margin of error). Applying a  $Z = 1.96$  (i.e. 95% confidence interval), an estimated  
27  
28 137 prevalence in the population of  $P = 0.42\%$  and a margin of error of  $0.15\%$  the estimated  
29  
30 138 sample size is 7141. In order to obtain 7500 participants on screening we consider a  
31  
32 139 stepwise approach with a 50% dropout on invitation. Therefore, around 15000 adults will  
33  
34 140 be randomly selected from the Portuguese NHS database to be contacted and invited to  
35  
36 141 enrol in the study. In Portugal, the majority of the population (including Portuguese  
37  
38 142 nationals and legal residents) is registered in a PCC, therefore the NHS database  
39  
40 143 includes almost the entire resident population in the local administrative entity (i.e.,  
41  
42 144 Nomenclature of Territorial Units for Statistics-NUTS). The sample stratification was  
43  
44 145 based on demographic stratification NUTS III, small regions for specific diagnoses as  
45  
46 146 per EUROSTAT classification. For each NUTS III, the PCC were selected according to  
47  
48 147 the feasibility of implementing the study (in total 38 PCC, 31 are part of the regional  
49  
50 148 health administrations and 7 of local health units). The number of participants will be  
51  
52 149 randomly selected according to the proportional allocation of each PCC. The distribution  
53  
54 150 of an estimated stratified sample by NUTS III and the correspondent study Stages is  
55  
56 151 presented in Table 1. The study will include male or female subjects with at least 18  
57  
58 152 years old, registered in the NHS database, who give voluntary consent. Subjects with  
59  
60

153 any specific physical and/or cognitive disabilities that prevented them from cooperating  
 154 with the study procedures (e.g., lung function tests) and/or understanding/answering  
 155 self-reported questionnaires will be excluded.

156

157 Table 1 – Distribution of the estimated stratified sample [13].

| NUTS III                                                              | Population     | Primary<br>care<br>centres | Stage 0<br>(0.15%) | Stage 1<br>(50%) | Stage 2<br>(24%) | Stage 3<br>(25%) |
|-----------------------------------------------------------------------|----------------|----------------------------|--------------------|------------------|------------------|------------------|
| Alto Minho/Cávado                                                     | 637305         | 2                          | 975                | 488              | 118              | 30               |
| Ave                                                                   | 414763         | 2                          | 635                | 317              | 77               | 19               |
| Área Metropolitana do<br>Porto                                        | 1719362        | 6                          | 2631               | 1316             | 319              | 81               |
| Alto Tâmega/Douro/Terras<br>de Trás-os-Montes                         | 389151         | 2                          | 596                | 298              | 72               | 18               |
| Tâmega e Sousa                                                        | 419811         | 2                          | 643                | 321              | 78               | 20               |
| Oeste                                                                 | 357868         | 2                          | 548                | 274              | 66               | 17               |
| Região de Aveiro                                                      | 363424         | 2                          | 556                | 278              | 67               | 17               |
| Região de Coimbra                                                     | 438228         | 2                          | 671                | 335              | 81               | 21               |
| Região de Leiria                                                      | 287040         | 1                          | 439                | 220              | 53               | 13               |
| Viseu Dão                                                             | 555628         | 2                          | 850                | 425              | 103              | 26               |
| Lafões/Beiras/Serra da<br>Estrela/Beira Baixa                         |                |                            |                    |                  |                  |                  |
| Médio Tejo/Lezíria do Tejo                                            | 474802         | 2                          | 727                | 363              | 88               | 22               |
| Área Metropolitana de<br>Lisboa                                       | 2827514        | 9                          | 4328               | 2164             | 525              | 133              |
| Alentejo Litoral/Baixo<br>Alentejo/Alto Alentejo/<br>Alentejo Central | 475674         | 2                          | 728                | 364              | 88               | 22               |
| Algarve                                                               | 440543         | 2                          | 674                | 337              | 82               | 21               |
| <b>Total</b>                                                          | <b>9801113</b> | <b>38</b>                  | <b>15000</b>       | <b>7500</b>      | <b>1819</b>      | <b>460</b>       |

158 NUTS - Nomenclature of Territorial Units for Statistics.

## 159 **Study procedures**

160 EPI-ASTHMA will use a stepwise approach, sequentially comprising the evaluation of  
161 symptoms patterns, clinical features, and tests for diagnosis confirmation, that includes  
162 the following stages (Figure 1):

- 163 • **Stage 0- Study enrolment:** Telephone call invitation to enrol participants;
- 164 • **Stage 1- Screening interview:** Telephone call interview to assess respiratory  
165 symptoms;
- 166 • **Stage 2- Diagnostic visit:** Clinical assessment, diagnostic confirmation and  
167 patient characterization;
- 168 • **Stage 3- Sub-group asthma characterization:** follow-up of patients with  
169 asthma (sub-group) and of patients with difficult-to-treat asthma and severe  
170 asthma, after 3 months.

### 171 **Stage 0- Study enrolment**

172 Around 15,000 randomised subjects 18 years or above will receive a telephone call  
173 invitation for enrolment in the study, to secure a sample size of 7500 participants for the  
174 next stage (assuming an acceptance of 50%) [14]. If needed, a second round of  
175 telephone calls will also be made to complete the number of patients in each region.  
176 Trained clinical secretaries will conduct this stage by following a semi-structured guide  
177 during the telephone call. A screening log of potential eligible participants will be  
178 completed to document the main reasons for participants not entering the study. Subjects  
179 who fulfil the study eligibility criteria and give their oral consent will be contacted in Stage  
180 1.

### 181 **Stage 1- Screening interview**

182 A computer-assisted telephone screening interview will be performed to 7500  
183 participants. The interview will include validated patient-reported outcome measures for  
184 screening asthma [15] and chronic obstructive pulmonary disease (COPD) [16],

1  
2  
3 185 dyspnoea [17] and assessment of physical activity [18,19], among other questions  
4  
5 186 formulated by the researchers (Table 2). At this stage participants will be considered  
6  
7 187 eligible and invited to participate in Stage 2 if they have, at least, one positive response  
8  
9 188 in the Adult Asthma Score (A2 Score) [15], i.e., medical history of asthma or asthma  
10  
11 189 medication intake or asthma symptoms. For quality control, 5% of not eligible participants  
12  
13 190 (with a negative score) will also be invited to participate in Stage 2. Interviews will be  
14  
15 191 performed by a centralised team of trained and experienced interviewers. Each  
16  
17 192 participant will be contacted for at least ten attempts during different occasions before  
18  
19 193 being considered excluded. Prior to any question, participants will be asked to reinforce  
20  
21 194 their oral consent to participate. A pilot study with 12 individuals was conducted to assess  
22  
23 195 the clarity and feasibility of the screening interview before starting the data collection  
24  
25 196 [20]. The duration of each interview was no longer than 17 minutes.

## 28 29 197 **Stage 2 – Diagnostic visit**

30  
31 198 The diagnostic visit will be conducted in a mobile outpatient clinic, located, whenever  
32  
33 199 possible, in the close vicinity of each PCC. At this stage, participants will give a written  
34  
35 200 informed consent before any study-related procedures. Stage 2 is expected to include  
36  
37 201 1800 participants, about 20% of participants from Stage 1 who fulfil the eligibility criteria,  
38  
39 202 plus 5% of participants for quality control. A detailed clinical assessment will be  
40  
41 203 performed, including clinical history, physical examination, lung function tests, blood  
42  
43 204 count and inflammatory biomarkers testing and patient-reported outcome measures  
44  
45 205 (Table 2). The clinical assessment will be carried out by a physician and the diagnostic  
46  
47 206 tests by an experienced team to assure the quality and the harmonisation of procedures.  
48  
49 207 All patients will be provided with a letter addressed to their primary care physician,  
50  
51 208 containing the results of their clinical evaluation. Patients with asthma will also be invited  
52  
53 209 to install and use the CARATm app (“Características Auto-reportadas de Asma em  
54  
55 210 Tecnologias Móveis”) in their daily life. CARATm is a Portuguese health mobile app  
56  
57 211 developed to collect clinical data from patients with asthma, such as asthma control and  
58  
59  
60



212 medication adherence, which is also interoperable with the Portuguese Severe Asthma  
213 Registry (asmagrave.pt).

214

### 215 **Stage 3- Sub-group asthma characterization**

216 This stage is expected to include 460 participants: a randomised sample of patients with  
217 asthma, and all patients identified with difficult-to-treat or severe asthma. Patients with  
218 difficult-to-treat and severe asthma will be defined according to GINA[21]. This stage  
219 takes place 3-months after the diagnostic visit and consists of a review of patients'  
220 electronic health records, a follow-up telephone call to the patient, and extraction of  
221 CARATm app data. The review of patients' electronic health records by a physician of  
222 their PCC will ensure an asthma control assessment on two different time points, and  
223 will confirm the treatment profile for an adequate GINA severity classification [7] (Table  
224 2).

225

226 Table 2. Summary of the data collection per study's stage.

227

|                                                     | Stage 1 | Stage 2 | Stage 3 |
|-----------------------------------------------------|---------|---------|---------|
| Sociodemographic and anthropometric characteristics | x       |         |         |
| Brief PA assessment                                 | x       | x       |         |
| Respiratory symptoms (wheeze, breathlessness)       | x       | x       | x       |
| CAPTURE                                             | x       |         |         |
| mMRC                                                | x       |         |         |
| Diagnosis of chronic respiratory disease            | x       | x       | x       |
| Comorbidities and allergies                         | x       | x       | x       |
| Smoking habits and ETS                              | x       | x       |         |
| A2 Score                                            | x       |         |         |
| Family history of asthma                            | x       | x       |         |
| Age of asthma onset                                 |         | x       |         |
| Inhaler prescription/use                            | x       |         |         |
| Mini-AQLQ                                           |         | x       |         |
| EQ-5D                                               |         | x       |         |

1  
2  
3  
4  
5  
6  
7  
8  
9  
10  
11  
12  
13  
14  
15  
16  
17  
18  
19  
20  
21  
22  
23  
24  
25  
26  
27  
28  
29  
30  
31  
32  
33  
34  
35  
36  
37  
38  
39  
40  
41  
42  
43  
44  
45  
46  
47  
48  
49  
50  
51  
52  
53  
54  
55  
56  
57  
58  
59  
60

|                                                           |   |   |    |
|-----------------------------------------------------------|---|---|----|
| Signs of asthma                                           |   | x |    |
| CARAT                                                     |   | x | x  |
| Asthma control (according to GINA)                        |   | x | x  |
| Asthma pharmacological treatment                          |   | x | x* |
| Inhalation technique                                      |   | x |    |
| Adherence to inhaled medication                           |   | x | x* |
| Other treatments                                          |   | x | x  |
| Number of exacerbations                                   |   | x | x* |
| Number of visits to emergency room                        |   | x | x* |
| Number of hospital admissions and length of hospital stay |   | x | x* |
| Number of unscheduled consultations                       |   | x | x* |
| Number of consultations primary care team                 |   | x | x* |
| Referral for specialist care                              |   | x | x* |
| Standard measurements (blood pressure, height, weight)    |   | x |    |
| Pre-BD and post-BD lung function                          |   | x |    |
| Pulmonary diagnostic tests (previously performed)         |   |   | x  |
| FeNO                                                      |   | x |    |
| Peripheral blood eosinophil and neutrophil counts         |   | x |    |
| Use of health and fitness apps                            | x | x |    |
| CARATm app use and opinion                                |   |   | x  |

A2 Score = A2 adult asthma score[15]; CAPTURE = COPD Assessment in Primary Care to Identify Undiagnosed Respiratory Disease and Exacerbation Risk [16]; mMRC = Modified British Medical Research Council [17]; PA = Brief physical activity assessment [18,19]; ETS = Environmental tobacco smoke; Mini-AQLQ = Mini Asthma Quality of Life Questionnaire[22,23]; EQ-5D = European Quality of Life Five Dimension [24]; CARAT = Control of Allergic Rhinitis and Asthma Test [25]; pre-BD and post-BD=Spirometry pre- and post-bronchodilator [26]; FeNO = Fractional exhaled nitric oxide [27]; || \*In the previous 3 and 12 months.

228

## 229 **Diagnosis criteria and definitions**

230 According to GINA, uncontrolled asthma includes one or both of the following: poor  
 231 symptom control and frequent exacerbations ( $\geq 2$ /year) requiring oral corticosteroids, or  
 232 serious exacerbations ( $\geq 1$ /year) requiring hospitalisation [21]. In our study, poor  
 233 symptom control will be based on a score less or equal than 24 in the Control of Allergic  
 234 Rhinitis and Asthma Test (CARAT) [25, 28]. Data regarding exacerbations or serious  
 235 exacerbations will be collected at stage 2 and 3.

1  
2  
3 236 Difficult-to-treat asthma is asthma that is uncontrolled despite treatment with medium or  
4  
5 237 high dose inhaled corticosteroids with a second controller or with maintenance oral  
6  
7 238 corticosteroids, or that requires high dose treatment to maintain symptom control and to  
8  
9 239 reduce the risk of exacerbations [21]. In our study, difficult-to-treat asthma will be defined  
10  
11 240 as uncontrolled asthma, despite prescription of high intensity treatment (GINA step  
12  
13 241 treatment 4-5). Severe asthma is a subset of difficult-to-treat asthma, that is an  
14  
15 242 uncontrolled asthma despite adherence with maximal optimised high dose ICS-LABA  
16  
17 243 (inhaled corticosteroid and a long-acting  $\beta$ 2-agonist) treatment and management of  
18  
19 244 contributory factors, such as inhaler adherence and technique or asthma that worsens  
20  
21 245 when high dose treatment is decreased. We will define severe asthma in the study as  
22  
23 246 uncontrolled asthma despite prescription of high intensity treatment (GINA step  
24  
25 247 treatment 4-5), and good treatment adherence (visual analogue scale (VAS)  $\geq 50$ ) [29]  
26  
27 248 and good inhaler technique (number of critical errors = [0-1]) [30].  
28  
29  
30  
31

### 32 **Data storage, blinding and statistical analysis plan**

33  
34 250 Participants will be anonymized with a unique subject ID and their data will be  
35  
36 251 anonymously stored in an appropriately secured server. In order to minimise diagnostic  
37  
38 252 bias, researchers, data collectors and participants will be blinded to patient eligibility  
39  
40 253 throughout data collection during Stage 2. Over the stages, data will be collected for a  
41  
42 254 specific electronic case report form (e-CRF) by using blended data (primary and  
43  
44 255 secondary data).  
45  
46

47 256 Statistical analysis will allow the characterization of the study population and the  
48  
49 257 estimation of each study's endpoints. The prevalence of asthma, difficult-to-treat and  
50  
51 258 severe asthma with the respective 95% confidence intervals (95% CI) will be calculated  
52  
53 259 in relation to the entire study population (Stage 1). Descriptive statistics such as i) central  
54  
55 260 tendency (e.g. mode, median or mean); ii) localisation (e.g. percentile); iii) dispersion  
56  
57 261 (e.g. interquartile range, standard deviation) and iv) distribution (e.g. skewness, kurtosis)  
58  
59 262 will be used, depending on the type of each variable, to characterise the total sample or  
60

1  
2  
3 263 subgroups. Associations between two quantitative variables will be calculated using the  
4  
5 264 Pearson's correlation coefficient or Spearman correlation coefficient, in case of normality  
6  
7 265 assumption are not verified. Association of two categorical variables will be determined  
8  
9 266 using the Chi-Square test or Fisher Exact test. Continuous variables between two groups  
10  
11 267 will be compared with a t-test for independent samples or Mann-Whitney test, whereas  
12  
13 268 for comparisons among 3 or more groups an ANOVA or Kruskal-Wallis test will be used.  
14  
15 269 Null-hypothesis statistical testing will also be applied in an exploratory manner to identify  
16  
17 270 any relationship patterns among variables. Subgroup analysis per each asthma control  
18  
19 271 level, GINA treatment step, Short-Acting Beta Agonists (SABA) overuse among others,  
20  
21 272 will also be conducted. Measurements of effect size will be presented and confidence  
22  
23 273 intervals at 95% will be estimated to account for the uncertainty of the sample estimates.  
24  
25 274 Interim analysis will be conducted per region after all stages are completed to monitor  
26  
27 275 the safety of study procedures and completeness of data collection. This analysis may  
28  
29 276 encompass potential changes in logistical, monitoring, and recruitment procedures to  
30  
31 277 secure sample size.  
32  
33  
34  
35 278 For the analysis of factors associated with asthma, difficult-to-treat asthma and severe  
36  
37 279 asthma, logistic regression models will be explored, taking into consideration these as  
38  
39 280 dependent variables and sociodemographic, clinical, among other variables, as  
40  
41 281 independent variables. The variables to be included in the multivariate model will be  
42  
43 282 selected from the univariate analyses, when p-value <0.100, those that do not meet  
44  
45 283 these criteria, but are considered clinically relevant, will also be possible candidates. The  
46  
47 284 final model will be analysed from two perspectives: 1) the calibration using the Hosmer-  
48  
49 285 Lemeshow goodness of fit test, and 2) the discrimination, using ROC curves and the  
50  
51 286 respective area under the curve. All results will be considered statistically significant  
52  
53 287 when p-value <0.05.  
54  
55  
56  
57 288

1  
2  
3 289 **DISCUSSION**  
4  
5 290  
6  
7

8 291 The EPI-ASTHMA study will address knowledge gaps in the epidemiology and  
9  
10 292 characterisation of asthma in mainland Portugal, using a multicentre approach that  
11  
12 293 combines different data collection methods, including a mHealth solution. Furthermore,  
13  
14 294 it will provide a more complete picture of the prevalence of difficult-to-treat and severe  
15  
16 295 asthma in Portugal, and will allow a better understanding of these patients'  
17  
18 296 characteristics, treatment profile and healthcare resource use. Further knowledge on the  
19  
20 297 distribution of severity and characteristics of patients in each group will better support  
21  
22 298 clinical management of the disease and inform personalised health policies for a smarter  
23  
24 299 allocation of the needed healthcare resources. This ambitious study is aligned with the  
25  
26 300 global need of epidemiological studies to monitor the trends in the prevalence of asthma,  
27  
28 301 which is vital to ensure that health policies fit the populations' needs [2,31,32].  
29  
30

31 302 The study design is one of its strengths. The combination of standardised questionnaires  
32  
33 303 with a standardised clinical evaluation, including lung function tests will allow a more  
34  
35 304 accurate diagnosis and characterisation of asthma. However, few limitations and  
36  
37 305 potential risks must be acknowledged. The definition of difficult-to-treat and severe  
38  
39 306 asthma will be based on the GINA treatment steps (4-5) and the assessment of asthma  
40  
41 307 control during the study Stages 2 and 3, which is only 3-months apart. An optimised  
42  
43 308 management during the follow-up period was not included, which is also part of the GINA  
44  
45 309 criteria to distinguish these asthma subgroups. This will probably be a source of error in  
46  
47 310 the estimation of the prevalence of these sub-groups, linked to the observational nature  
48  
49 311 of this study. The 38 PCC will be conveniently selected, which can be seen as a source  
50  
51 312 of bias. Yet, we considered the geographic areas and population distribution of each  
52  
53 313 Portuguese region as well as their interest to participate and willingness to collect data  
54  
55 314 and not only based on previous asthma research experience which will preserve the  
56  
57 315 study real-world nature. Clinical secretaries (Stage 0) and physicians (Stage 2 and 3)  
58  
59  
60

1  
2  
3 316 will collaborate across different country's regions, which may introduce some  
4  
5 317 heterogeneity in data collection. Nevertheless, both clinical secretaries and physicians  
6  
7 318 will be previously trained and continuously motivated by the management team, which  
8  
9 319 will be available to clarify doubts on a 24/7 basis. To deal with possible risks, the study's  
10  
11 320 steering committee will supervise the execution and will take academic responsibility for  
12  
13 321 the study. Another limitation is the need for this multicentre study to be approved by the  
14  
15 322 ethics committees responsible for each regional health administration/local health unit.  
16  
17 323 Although all applications will be similar in their content, they will differ in a number of  
18  
19 324 aspects to comply with each institution's formal requirements, resulting in additional  
20  
21 325 complexity and may hinder the compliance with the study timeline. To mitigate these  
22  
23 326 risks, an experienced contracted research organisation that knows the specificities of  
24  
25 327 each administration/health unit is supporting us through all the process.  
26  
27  
28  
29 328 EPI-ASTHMA will be managed combining traditional management methodologies with  
30  
31 329 an "agile" approach [33] using the SCRUM framework on Jira software. This combination  
32  
33 330 is expected to fulfil the need to make the study adaptable and to anticipate future needs  
34  
35 331 that are important and can be forgotten due to the dimension of the study.  
36  
37

## 38 **Conclusion**

39  
40 333  
41 334 EPI-ASTHMA will be the first population-based study in Portugal to determine the  
42  
43 335 prevalence of asthma, difficult-to-treat and severe asthma and to better understand the  
44  
45 336 patient's disease characteristics, treatment patterns and use of healthcare resources.  
46  
47 337 The knowledge generated by this nationwide robust study has great potential to inform  
48  
49 338 health policies and to improve the clinical outcomes of patients with asthma in Portugal.  
50  
51

## 52 **Ethics and dissemination:**

53  
54  
55 340 The study will follow the tenants of the Declaration of Helsinki and the Oviedo  
56  
57 341 Convention. Ethical approvals and data privacy clearance for the study were obtained  
58  
59 342 by the Ethics Committee and Data Protection Officer of the local health unit of  
60

1  
2  
3 343 Matosinhos, Porto (ULSM; 38/CES/JAS, March 12th ,2021), Alto Minho (ULSAM;  
4  
5 344 38/2021/CES, June 17th, 2021) and the Regional Health Administration of Lisbon and  
6  
7 345 Vale do Tejo (ARSLVT; 035/CES/INV/2021; December 3rd 2021) and is under revision  
8  
9 346 in the remain regional ethical committees for health administration/local health units. All  
10  
11 347 participants will receive both verbal and written information explaining the purpose of the  
12  
13 348 study and they will have to provide verbal and written informed consent. Results will be  
14  
15 349 presented at both national and international scientific meetings and published in peer-  
16  
17 350 reviewed journals. Seasonal newsletters will be provided to the funders of the study as  
18  
19 351 well as all the involved participants.  
20  
21  
22  
23  
24

352

## 353 **Statements**

### 354 Patient consent for publication

355 Not applicable.

356

### 357 Authors' contributions

358 Jaime Correia de Sousa, João Almeida Fonseca and Filipa Bernardo conceptualised the  
359 study. Cristina Jácome wrote the statistical analysis plan and Pedro Teixeira conducted  
360 the sample size calculation. Cristina Jácome and Catarina João wrote the first draft of  
361 the manuscript. Cristina Jácome, Dinis Brito, Catarina João, Filipa Lopes, Janete Santos,  
362 Liliana Amorim, Maria João Barbosa, Marisa Pardal, Pedro Teixeira, Filipa Bernardo,  
363 João Almeida Fonseca, Jaime Correia de Sousa contributed to and refined the  
364 manuscript for scientific content. All authors read and approved the final version of the  
365 manuscript.

366

### 367 Competing interests

1  
2  
3 368 JCS reports Advisory Board from Boheringer Ingelheim, personal fees and Advisory  
4  
5 369 Board from GSK, grants, personal fees and Advisory Board from AstraZeneca, personal  
6  
7 370 fees and Advisory Board from Bial, non-financial support from Mundipharma, personal  
8  
9 371 fees from Sanofi, Advisory Board from Novartis, outside the submitted work. JAF  
10  
11 372 declares grants from or research agreements with AstraZeneca, Mundipharma, Sanofi  
12  
13 373 Regeneron and Novartis. Personal fees for lectures and attending advisory boards from  
14  
15 374 AstraZeneca, GSK, Mundipharma, Novartis, Sanofi Regeneron and TEVA. MP and FB  
16  
17 375 are employees of AstraZeneca, Produtos Farmacêuticos. The remaining authors declare  
18  
19 376 no conflicts of interest.  
20  
21  
22 377

#### 23 24 378 Funding

25  
26  
27 379 Funding for this study was provided by AstraZeneca. The funding body had no role in  
28  
29 380 the conducting or reporting of the study. N/A for the award/grant number.  
30  
31  
32 381

#### 33 34 35 382 **REFERENCES**

- 36  
37  
38 383 1. Chung KF, Wenzel SE, Brozek JL, Bush A, Castro M, Sterk PJ, et al. International  
39 384 ERS/ATS guidelines on definition, evaluation and treatment of severe asthma. *Eur*  
40 385 *Respir J.* 2014;43: 343–373.
- 41  
42 386 2. Asher MI, García-Marcos L, Pearce NE, Strachan DP. Trends in worldwide asthma  
43 387 prevalence. *Eur Respir J.* 2020;56. doi:10.1183/13993003.02094-2020
- 44  
45 388 3. Sá-Sousa A, Jacinto T, Azevedo LF, Morais-Almeida M, Robalo-Cordeiro C,  
46 389 Bugalho-Almeida A, et al. Operational definitions of asthma in recent  
47 390 epidemiological studies are inconsistent. *Clin Transl Allergy.* 2014;4: 24.
- 48  
49 391 4. Sa-Sousa A, Morais-Almeida M, Azevedo LF, Carvalho R, Jacinto T, Todo-Bom A,  
50 392 et al. Prevalence of asthma in Portugal - The Portuguese National Asthma Survey.  
51 393 *Clin Transl Allergy.* 2012;2: 15.
- 52  
53 394 5. de Sousa JC, Santo ME, Colaço T, Almada-Lobo F, Yaphe J. Asthma in an urban  
54 395 population in Portugal: a prevalence study. *BMC Public Health.* 2011;11: 347.
- 55  
56 396 6. da Saúde D-G. Programa Nacional para as Doenças Respiratórias 2017. Lisboa:  
57 397 Direção-Geral da Saúde; 2017.
- 58  
59 398 7. Global Initiative for Asthma. Global Strategy for Asthma Management and  
60 399 Prevention. 2021.



- 1  
2  
3 400 8. Sá-Sousa A, Amaral R, Morais-Almeida M, Araújo L, Azevedo LF, Bugalho-  
4 401 Almeida A, et al. Asthma control in the Portuguese National Asthma Survey. *Rev*  
5 402 *Port Pneumol.* 2015;21: 209–213.
- 6  
7 403 9. Narasimhan K. Difficult to Treat and Severe Asthma: Management Strategies. *Am*  
8 404 *Fam Physician.* 2021;103: 286–290.
- 9  
10 405 10. Ryan D, Murphy A, Ställberg B, Baxter N, Heaney LG. “SIMPLES”: a structured  
11 406 primary care approach to adults with difficult asthma. *Prim Care Respir J.* 2013;22:  
12 407 365–373.
- 13  
14 408 11. von Elm E, Altman DG, Egger M, Pocock SJ, Gøtzsche PC, Vandenbroucke JP, et  
15 409 al. The Strengthening the Reporting of Observational Studies in Epidemiology  
16 410 (STROBE) statement: guidelines for reporting observational studies.  
17 411 *Epidemiology.* 2007;18: 800–804.
- 18  
19 412 12. Kasiulevičius V, Šapoka V, Filipavičiūtė R. Sample size calculation in  
20 413 epidemiological studies. *Gerontologija.* 2006;7: 225–231.
- 21  
22 414 13. Instituto Nacional de Estatística. Censos 2011. XV Recenseamento Geral da  
23 415 População : V Recenseamento Geral da Habitação. Resultados definitivos :  
24 416 Portugal. Lisboa : INE, 2012. IV Recenseamento Geral de Habitação. Lisboa,  
25 417 Portugal: Instituto Nacional de ...; 2012.
- 26  
27 418 14. Lopes C, Torres D, Oliveira A, Severo M, Alarcão V, Guiomar S, et al. Inquérito  
28 419 Alimentar Nacional e de Atividade Física IAN-AF 2015-2016: relatório de  
29 420 resultados. 2017. Available:  
30 421 <https://repositorioaberto.up.pt/bitstream/10216/111073/2/257104.pdf>
- 31  
32 422 15. Sá-Sousa A, Pereira AM, Almeida R, Araújo L, Couto M, Jacinto T, et al. Adult  
33 423 Asthma Scores-Development and Validation of Multivariable Scores to Identify  
34 424 Asthma in Surveys. *J Allergy Clin Immunol Pract.* 2019;7: 183–190.e6.
- 35  
36 425 16. Martinez FJ, Mannino D, Leidy NK, Malley KG, Bacci ED, Barr RG, et al. A New  
37 426 Approach for Identifying Patients with Undiagnosed Chronic Obstructive  
38 427 Pulmonary Disease. *Am J Respir Crit Care Med.* 2017;195: 748–756.
- 39  
40 428 17. Standardized Questionnaires on Respiratory Symptoms. *Br Med J.* 1960;2: 1665–  
41 429 1665.
- 42  
43 430 18. Cruz J, Jácome C, Oliveira A, Paixão C, Rebelo P, Flora S, et al. Construct validity  
44 431 of the brief physical activity assessment tool for clinical use in COPD. *Clin Respir*  
45 432 *J.* 2021;15: 530–539.
- 46  
47 433 19. Marshall AL, Smith BJ, Bauman AE, Kaur S. Reliability and validity of a brief  
48 434 physical activity assessment for use by family doctors. *Br J Sports Med.* 2005;39:  
49 435 294–7; discussion 294–7.
- 50  
51 436 20. van Teijlingen E, Hundley V. The importance of pilot studies. *Nurs Stand.* 2002;16:  
52 437 33–36.
- 53  
54 438 21. Global Initiative for Asthma. A new Pocket Guide, “Diagnosis and Management of  
55 439 Difficult-to-treat and Severe Asthma in adolescent and adult patients.” 2021 Apr.
- 56  
57 440 22. Ferreira PL, Mendonça C, Newparth N, Mata p, Juniper EF, Mear I. Quality of life  
58 441 in asthma: cultural adaptation of Juniper’s AQLQ to Portuguese. 1998. p. 7 (7):  
59 442 590.

- 1  
2  
3 443 23. Juniper EF, Guyatt GH, Cox FM, Ferrie PJ, King DR. Development and validation  
4 444 of the Mini Asthma Quality of Life Questionnaire. *Eur Respir J*. 1999;14: 32–38.  
5  
6 445 24. Ferreira PL, Ferreira LN, Pereira LN. Contributos para a Validação da Versão  
7 446 Portuguesa do EQ-5D. *Acta Med Port*. 2013;26: 664.  
8  
9 447 25. Fonseca JA, Nogueira-Silva L, Morais-Almeida M, Azevedo L, Sa-Sousa A,  
10 448 Branco-Ferreira M, et al. Validation of a questionnaire (CARAT10) to assess  
11 449 rhinitis and asthma in patients with asthma. *Allergy*. 2010;65: 1042–1048.  
12  
13 450 26. Graham BL, Steenbruggen I, Miller MR, Barjaktarevic IZ, Cooper BG, Hall GL, et  
14 451 al. Standardization of Spirometry 2019 Update. An Official American Thoracic  
15 452 Society and European Respiratory Society Technical Statement. *Am J Respir Crit*  
16 453 *Care Med*. 2019;200: e70–e88.  
17  
18 454 27. Dweik RA, Boggs PB, Erzurum SC, Irvin CG, Leigh MW, Lundberg JO, et al. An  
19 455 official ATS clinical practice guideline: interpretation of exhaled nitric oxide levels  
20 456 (FENO) for clinical applications. *Am J Respir Crit Care Med*. 2011;184: 602–615.  
21  
22 457 28. Fonseca JA, Nogueira-Silva L, Morais-Almeida M, Sa-Sousa A, Azevedo LF,  
23 458 Ferreira J, et al. Control of Allergic Rhinitis and Asthma Test (CARAT) can be used  
24 459 to assess individual patients over time. *Clinical and Translational Allergy*. 2012. p.  
25 460 16.  
26  
27 461 29. Ohta K, Jean Bousquet P, Akiyama K, Adachi M, Ichinose M, Ebisawa M, et al.  
28 462 Visual analog scale as a predictor of GINA-defined asthma control. The SACRA  
29 463 study in Japan. *J Asthma*. 2013;50: 514–521.  
30  
31 464 30. Bosnic-Anticevich SZ, Cvetkovski B, Azzi EA, Srour P, Tan R, Kritikos V.  
32 465 Identifying Critical Errors: Addressing Inhaler Technique in the Context of Asthma  
33 466 Management. *Pulm Ther*. 2018;4: 1–12.  
34  
35 467 31. Bousquet J W. Global surveillance, prevention and control of chronic respiratory  
36 468 diseases : a comprehensive approach. 2007  
37  
38 469 32. Global Asthma Network. The Global Asthma Report 2018. Auckland, New  
39 470 Zealand: 2018.  
40  
41 471 33. Pavlović, K. B., Berić, I., & Berezljjev, L. AGILE TRANSFORMATION IN CLINICAL  
42 472 RESEARCH. *European Project Management Journal*. 2018;8: 65–70.  
43  
44  
45 473

## 474 **Figures**

475 **Figure 1:** Flow of participants through study's stages. SuA - severe and difficult to treat  
476 asthma.



Figure 1: Flow of participants through study’s stages. SuA - severe and difficult to treat asthma.

62x57mm (300 x 300 DPI)

## STROBE Statement—checklist of items that should be included in reports of observational studies

|                              | Item No | Recommendation                                                                                                                                                                       | Item found on page |
|------------------------------|---------|--------------------------------------------------------------------------------------------------------------------------------------------------------------------------------------|--------------------|
| <b>Title and abstract</b>    | 1       | (a) Indicate the study's design with a commonly used term in the title or the abstract                                                                                               | 1-2                |
|                              |         | (b) Provide in the abstract an informative and balanced summary of what was done and what was found                                                                                  | 2                  |
| <b>Introduction</b>          |         |                                                                                                                                                                                      |                    |
| Background/rationale         | 2       | Explain the scientific background and rationale for the investigation being reported                                                                                                 | 4                  |
| Objectives                   | 3       | State specific objectives, including any prespecified hypotheses                                                                                                                     | 4-5                |
| <b>Methods</b>               |         |                                                                                                                                                                                      |                    |
| Study design                 | 4       | Present key elements of study design early in the paper                                                                                                                              | 5                  |
| Setting                      | 5       | Describe the setting, locations, and relevant dates, including periods of recruitment, exposure, follow-up, and data collection                                                      | 7-11               |
| Participants                 | 6       | (a) <i>Cross-sectional study</i> —Give the eligibility criteria, and the sources and methods of selection of participants                                                            | 7-10               |
|                              |         | (b) <i>Cohort study</i> —For matched studies, give matching criteria and number of exposed and unexposed                                                                             | NA                 |
|                              |         | <i>Case-control study</i> —For matched studies, give matching criteria and the number of controls per case                                                                           |                    |
| Variables                    | 7       | Clearly define all outcomes, exposures, predictors, potential confounders, and effect modifiers. Give diagnostic criteria, if applicable                                             | 11 and table 2     |
| Data sources/<br>measurement | 8*      | For each variable of interest, give sources of data and details of methods of assessment (measurement). Describe comparability of assessment methods if there is more than one group |                    |
| Bias                         | 9       | Describe any efforts to address potential sources of bias                                                                                                                            | 12 and 14          |
| Study size                   | 10      | Explain how the study size was arrived at                                                                                                                                            | 6-7 and table 1    |
| Quantitative<br>variables    | 11      | Explain how quantitative variables were handled in the analyses. If applicable, describe which groupings were chosen and why                                                         | 12-13              |
| Statistical methods          | 12      | (a) Describe all statistical methods, including those used to control for confounding                                                                                                | 12-13              |
|                              |         | (b) Describe any methods used to examine subgroups and interactions                                                                                                                  | 12-13              |
|                              |         | (c) Explain how missing data were addressed                                                                                                                                          | NA                 |
|                              |         | (d) <i>Cross-sectional study</i> —If applicable, describe analytical methods taking account of sampling strategy                                                                     | 12-13              |
|                              |         | (e) Describe any sensitivity analyses                                                                                                                                                | NA                 |

Continued on next page

| <b>Results</b>           |     |                                                                                                                                                                                                              |       |
|--------------------------|-----|--------------------------------------------------------------------------------------------------------------------------------------------------------------------------------------------------------------|-------|
| Participants             | 13* | (a) Report numbers of individuals at each stage of study—eg numbers potentially eligible, examined for eligibility, confirmed eligible, included in the study, completing follow-up, and analysed            | NA    |
|                          |     | (b) Give reasons for non-participation at each stage                                                                                                                                                         | NA    |
|                          |     | (c) Consider use of a flow diagram                                                                                                                                                                           | NA    |
| Descriptive data         | 14* | (a) Give characteristics of study participants (eg demographic, clinical, social) and information on exposures and potential confounders                                                                     | NA    |
|                          |     | (b) Indicate number of participants with missing data for each variable of interest                                                                                                                          | NA    |
|                          |     | (c) <i>Cohort study</i> —Summarise follow-up time (eg, average and total amount)                                                                                                                             | NA    |
| Outcome data             | 15* | <i>Cohort study</i> —Report numbers of outcome events or summary measures over time                                                                                                                          | NA    |
|                          |     | <i>Case-control study</i> —Report numbers in each exposure category, or summary measures of exposure                                                                                                         | NA    |
|                          |     | <i>Cross-sectional study</i> —Report numbers of outcome events or summary measures                                                                                                                           | NA    |
| Main results             | 16  | (a) Give unadjusted estimates and, if applicable, confounder-adjusted estimates and their precision (eg, 95% confidence interval). Make clear which confounders were adjusted for and why they were included | NA    |
|                          |     | (b) Report category boundaries when continuous variables were categorized                                                                                                                                    | NA    |
|                          |     | (c) If relevant, consider translating estimates of relative risk into absolute risk for a meaningful time period                                                                                             | NA    |
| Other analyses           | 17  | Report other analyses done—eg analyses of subgroups and interactions, and sensitivity analyses                                                                                                               | NA    |
| <b>Discussion</b>        |     |                                                                                                                                                                                                              |       |
| Key results              | 18  | Summarise key results with reference to study objectives                                                                                                                                                     | NA    |
| Limitations              | 19  | Discuss limitations of the study, taking into account sources of potential bias or imprecision. Discuss both direction and magnitude of any potential bias                                                   | 14-15 |
| Interpretation           | 20  | Give a cautious overall interpretation of results considering objectives, limitations, multiplicity of analyses, results from similar studies, and other relevant evidence                                   | NA    |
| Generalisability         | 21  | Discuss the generalisability (external validity) of the study results                                                                                                                                        | NA    |
| <b>Other information</b> |     |                                                                                                                                                                                                              |       |
| Funding                  | 22  | Give the source of funding and the role of the funders for the present study and, if applicable, for the original study on which the present article is based                                                | 16    |

\*Give information separately for cases and controls in case-control studies and, if applicable, for exposed and unexposed groups in cohort and cross-sectional studies.

**Note:** An Explanation and Elaboration article discusses each checklist item and gives methodological background and published examples of transparent reporting. The STROBE checklist is best used in conjunction with this article (freely available on the Web sites of PLoS Medicine at <http://www.plosmedicine.org/>, Annals of Internal Medicine at <http://www.annals.org/>, and Epidemiology at <http://www.epidem.com/>). Information on the STROBE Initiative is available at [www.strobe-statement.org](http://www.strobe-statement.org).
